# Supplementary material for: Family-wide Structural and Biophysical Analysis of Binding Interactions among Non-clustered δ-Protocadherins
Source: PubMed Central journal article supplement — Cell Rep. Author manuscript; Available in PMC 2020 Mar 19. (PMC7082078; doi:10.1016/j.celrep.2020.02.003), 2020-02-25
Supplement: NIHMS1566858-supplement-1.pdf [file NIHMS1566858-supplement-1.pdf]

Cell Reports, Volume 30

## Supplemental Information

### Family-wide Structural and Biophysical Analysis of Binding Interactions among Non-clustered $\delta$ -Protocadherins

Oliver J. Harrison, Julia Brasch, Phinikoula S. Katsamba, Goran Ahlsen, Alex J. Noble, Hanbin Dan, Rosemary V. Sampogna, Clinton S. Potter, Bridget Carragher, Barry Honig, and Lawrence Shapiro

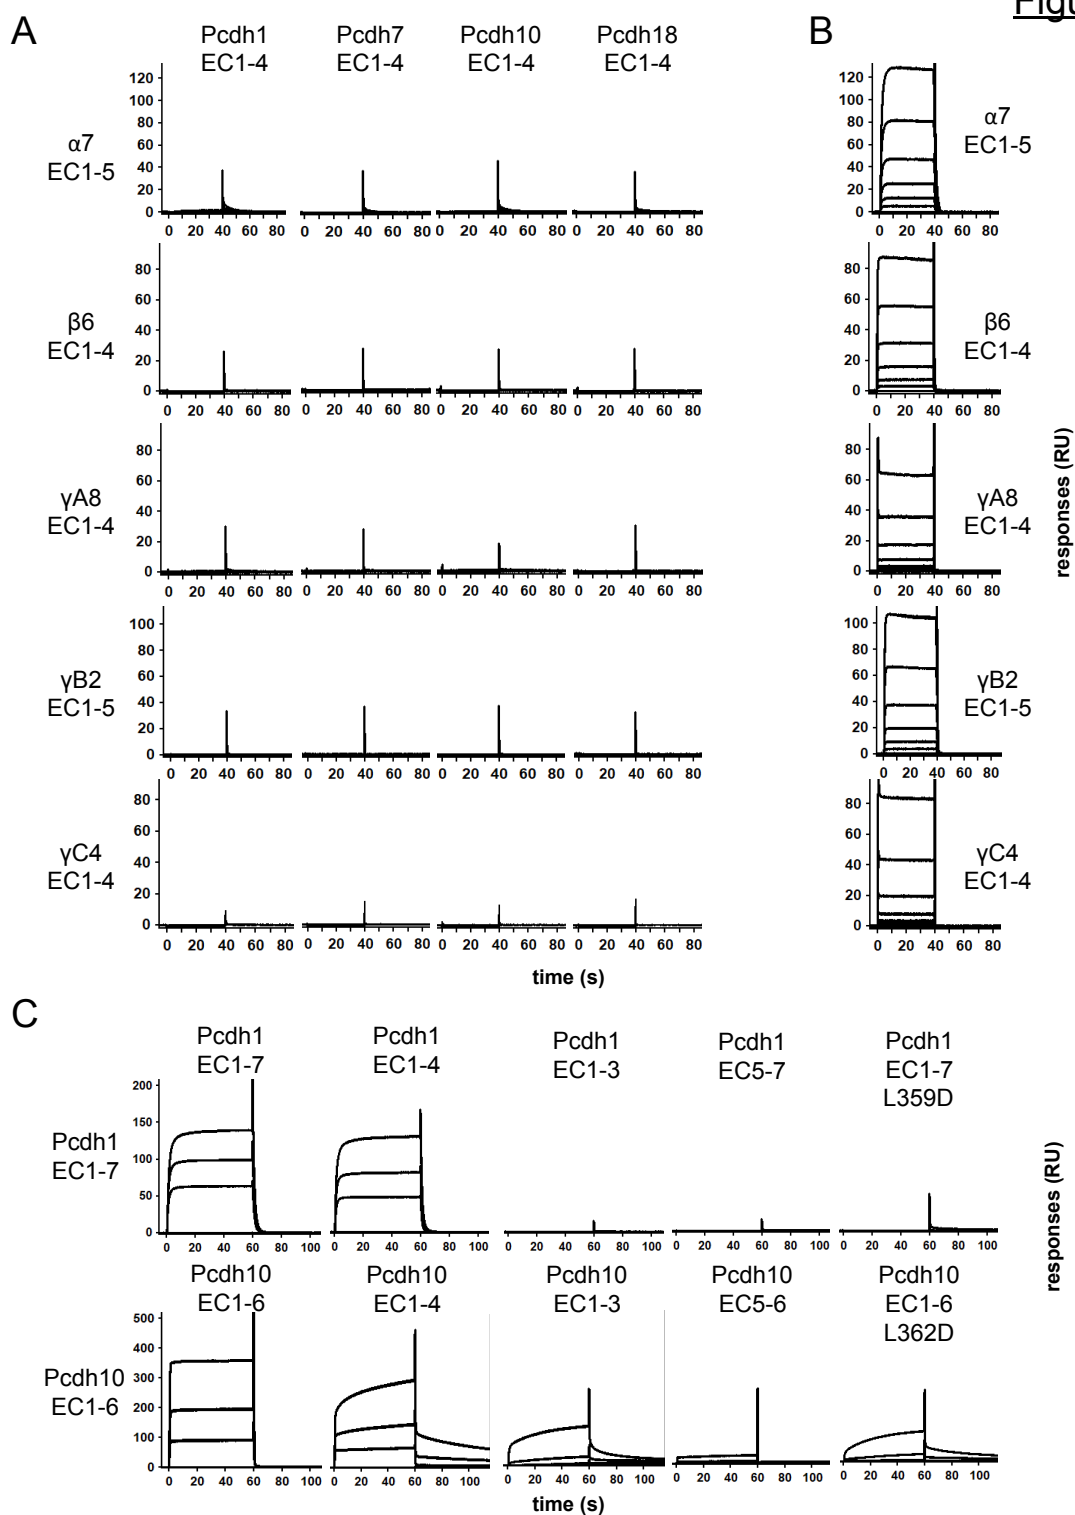

**Figure S1: SPR analysis of interactions between  $\delta$  and clustered protocadherin *trans*-binding fragments and domain-dependence of homophilic  $\delta$  pcdh homophilic binding, Related to Figure 1.**

(A) Assessment of heterophilic binding of EC1-4 fragments of  $\delta$  pcdhs-1, -7, -10 and -18 to surfaces tethered with clustered pcdh fragments  $\alpha 7$  EC1-5,  $\beta 6$  EC1-4,  $\gamma A 8$  EC1-4,  $\gamma B 2$  EC1-5 and  $\gamma C 4$  EC1-4. Each  $\delta$  protocadherin was tested at three analyte concentrations (27, 9, and  $3 \mu M$ ). (B) Homophilic binding of the respective clustered pcdhs  $\alpha 7$  EC1-5,  $\beta 6$  EC1-4,  $\gamma A 8$  EC1-4,  $\gamma B 2$  EC1-5 and  $\gamma C 4$  over surfaces tethered with biotinylated forms of the same proteins. Each clustered pcdh was tested at six concentrations, 24, 8, 2.67, .89, 0.3 and  $0.1 \mu M$ . (C) Binding of full ectodomains, deletion fragments, and point mutants of pcdh1 ( $\delta 1$ ) and pcdh10 ( $\delta 2$ ) over the respective full ectodomain surfaces. Analyte concentrations as in panel A.

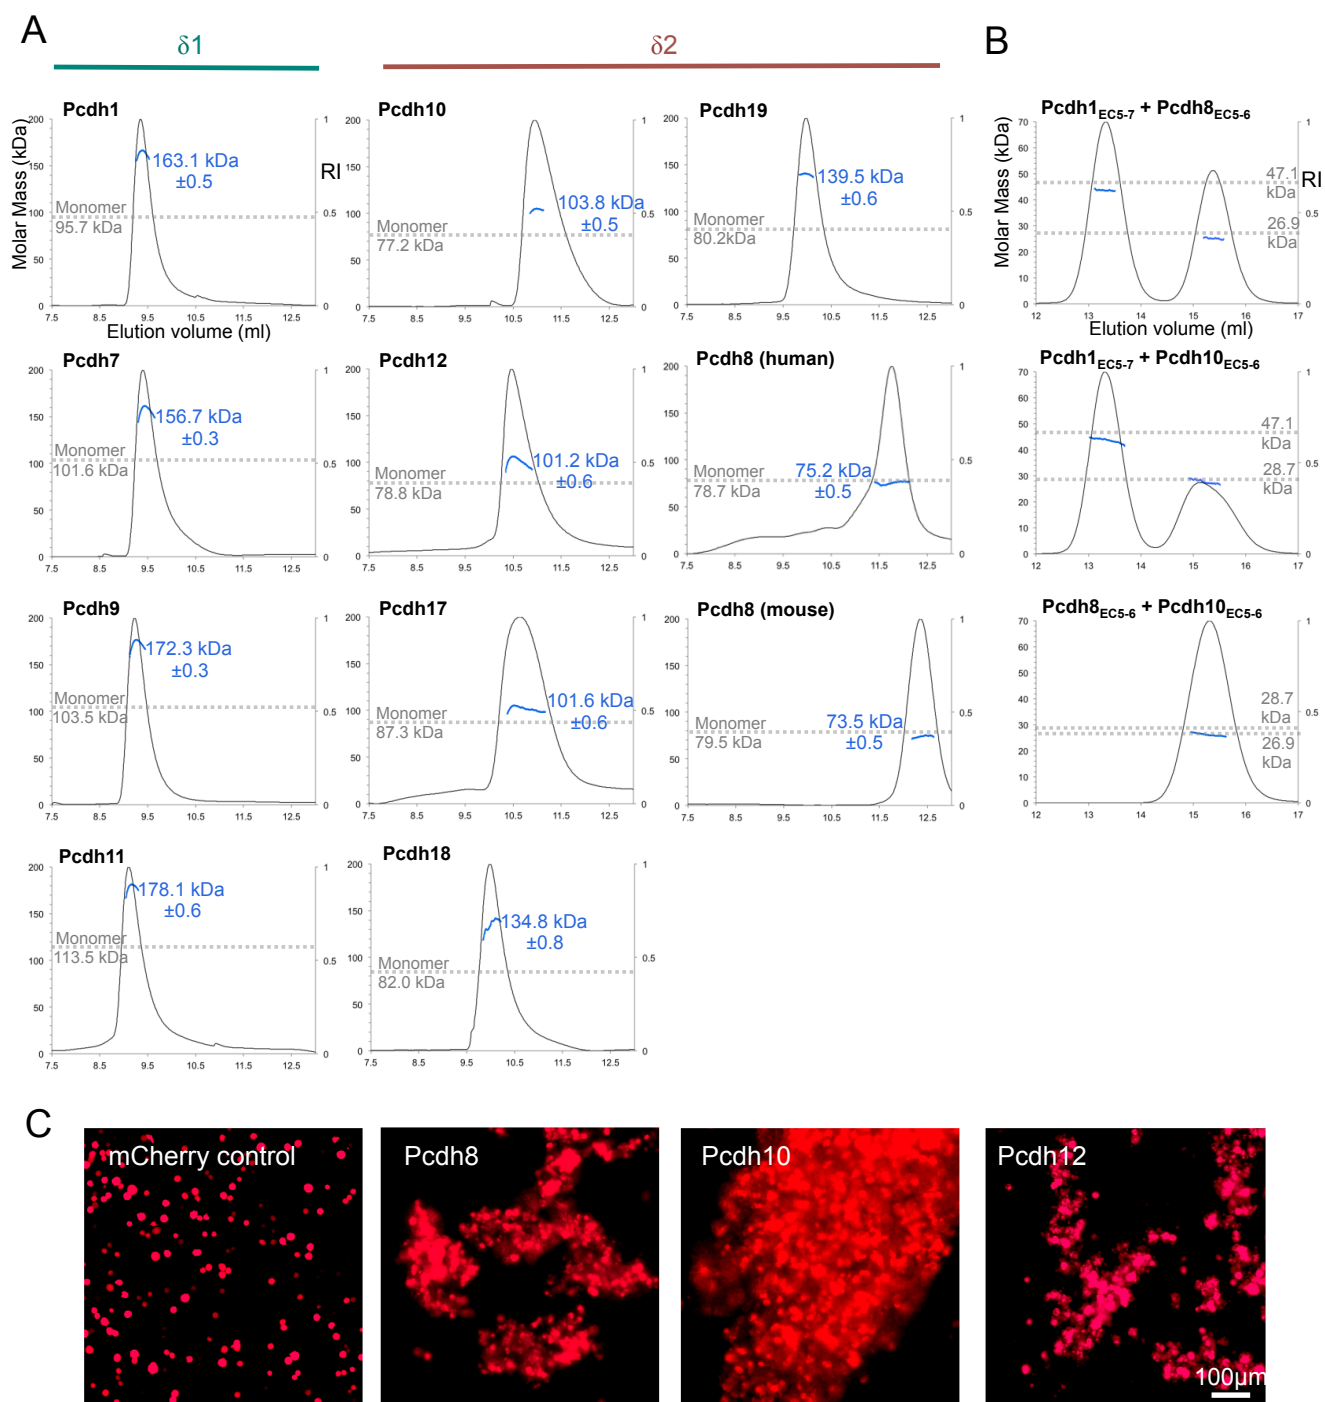

**Figure S2: Analysis of  $\delta$  protocadherin oligomerization state by SEC-MALS and cell aggregation, Related to Table 1.**

Purified extracellular regions of  $\delta$  protocadherins analyzed using size exclusion chromatography (SEC) with in-line multi-angle light scattering (MALS). **(A)** Plots showing protein peaks as refractive index changes (RI, relative scale) against elution volume (ml). Each protocadherin migrated as a single peak. Apparent molecular masses calculated from light scattering analysis are plotted in blue at the peak positions; monomeric molecular masses determined by mass-spectrometry are indicated by a dotted line. All samples were loaded at 24µM concentration. Void volume of the SEC column is ~8ml. **(B)** SEC-MALS analyses of pairwise 1:1 mixtures of membrane-proximal domain fragments of pcdhs-1, -8 and -10 to test potential heterophilic interactions. Loading concentration 100µM for each protein. **(C)** Aggregation of K562 cells transiently transfected with full-length human pcdh-mCherry constructs or mCherry alone, visualized by fluorescence microscopy.

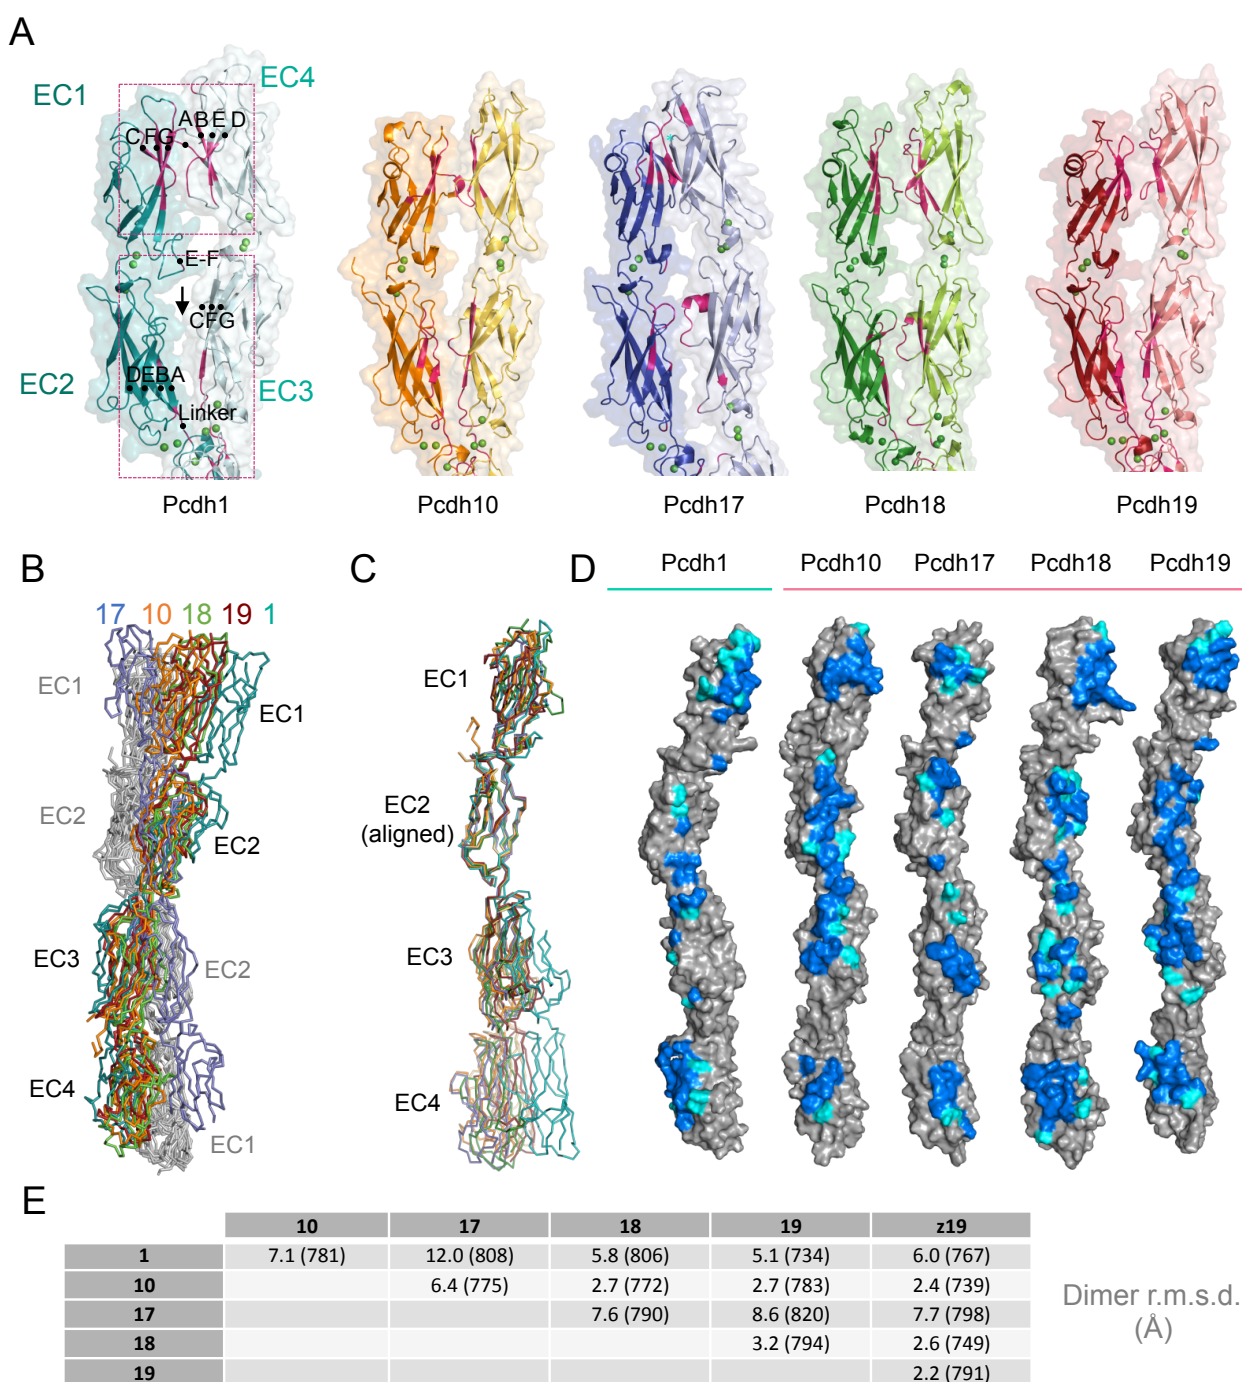

**Figure S3: Variations in overall *trans* dimer structure between  $\delta$  protocadherin subtypes, Related to Figures 2 and 3.**

(A) *Trans* dimer topologies of pcdhs-1, -10, -17, -18 and -19 (left to right) depicted as ribbons with molecular surfaces. Residues with at least 5% of their accessible surface area buried in the dimer are highlighted in magenta. Dashed boxes delimit EC1:4 and EC2:3 interface regions expanded in Figure 3. Arrow indicates regions of lesser contact in pcdh1. Half of each 2-fold symmetric dimer is shown. (B)  $C\alpha$  traces of *trans* dimers superposed over one protomer (background, gray traces) to show differences in orientation of the partner protomer (colored according to legend). (C) Individual protomers of the same set of structures as panel (B), superposed over domain EC2 to show differences in interdomain angles. (D) Molecular surfaces of single protomers (gray) with *trans* dimer interface residues highlighted in cyan (<5% buried) and blue (>5% buried). (E) RMSD values between  $C\alpha$  atoms of superposed whole *trans* dimer structures. Number of aligned  $C\alpha$  atoms indicated in parentheses.

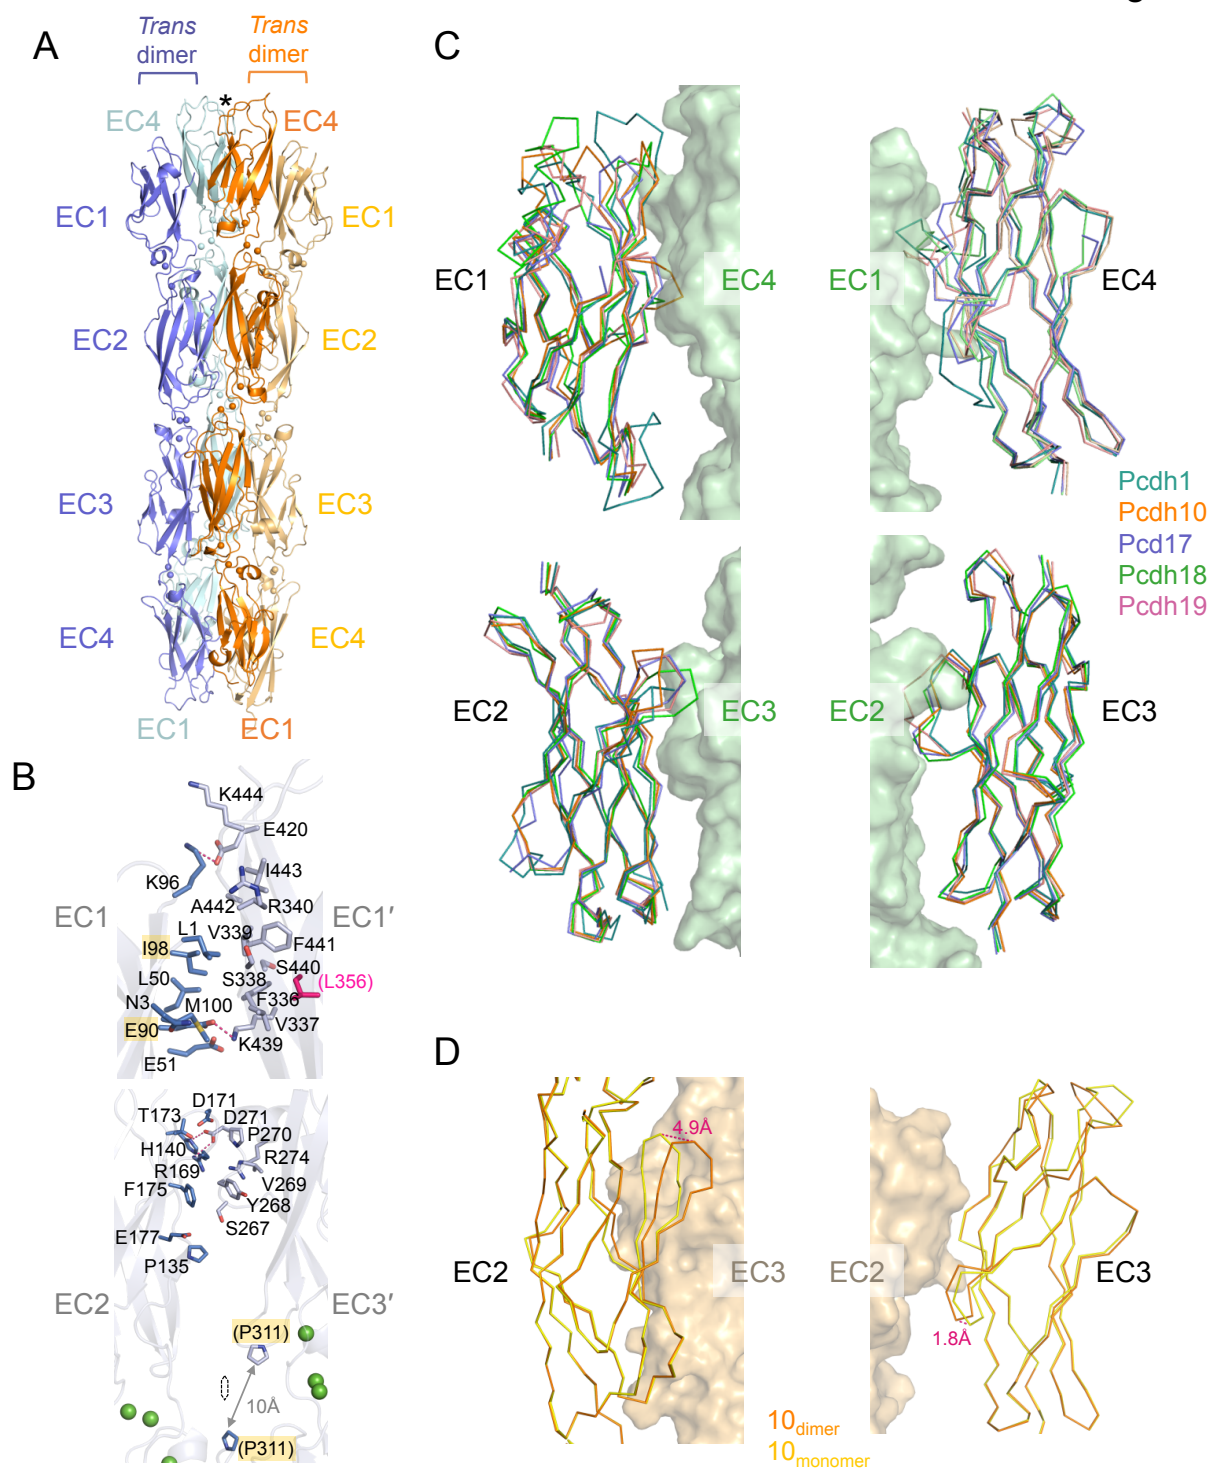

**Figure S4: Divergent pdch17 dimer and variations in interface loop conformations, Related to Figures 2 and 3.**

(A) Ribbon view of two putative *trans* dimers of pdch17 EC1-4 in the crystallographic asymmetric unit. Asterisk indicates a close non-*trans* dimer lattice contact between EC4 domains. Spheres: calcium ions. (B) Residue-level view of pdch17 *trans* dimer interface regions EC1:EC4 (top) and EC2:EC3 (bottom). Side chains of interfacial residues (>5% buried) are shown as sticks; those conserved among  $\delta 2$  pdchs are highlighted gold. Leu359 (magenta, equivalent to Leu359 in pdch10) is solvent exposed. Spheres: calcium ions. (C) Carbon  $\alpha$  traces of superposed EC domains from *trans* dimer structures of pdchs -1, -10, -17, -18, and -19. Partner protomer in a representative dimer structure (pdch10) is shown as a molecular surface (green). (D) Superpositions of domains EC2 (left panel) or EC3 (right panel) of monomer and dimer crystal forms of pdch10, depicted as in panel C. Dashed lines indicate representative shifts.



Figure S5

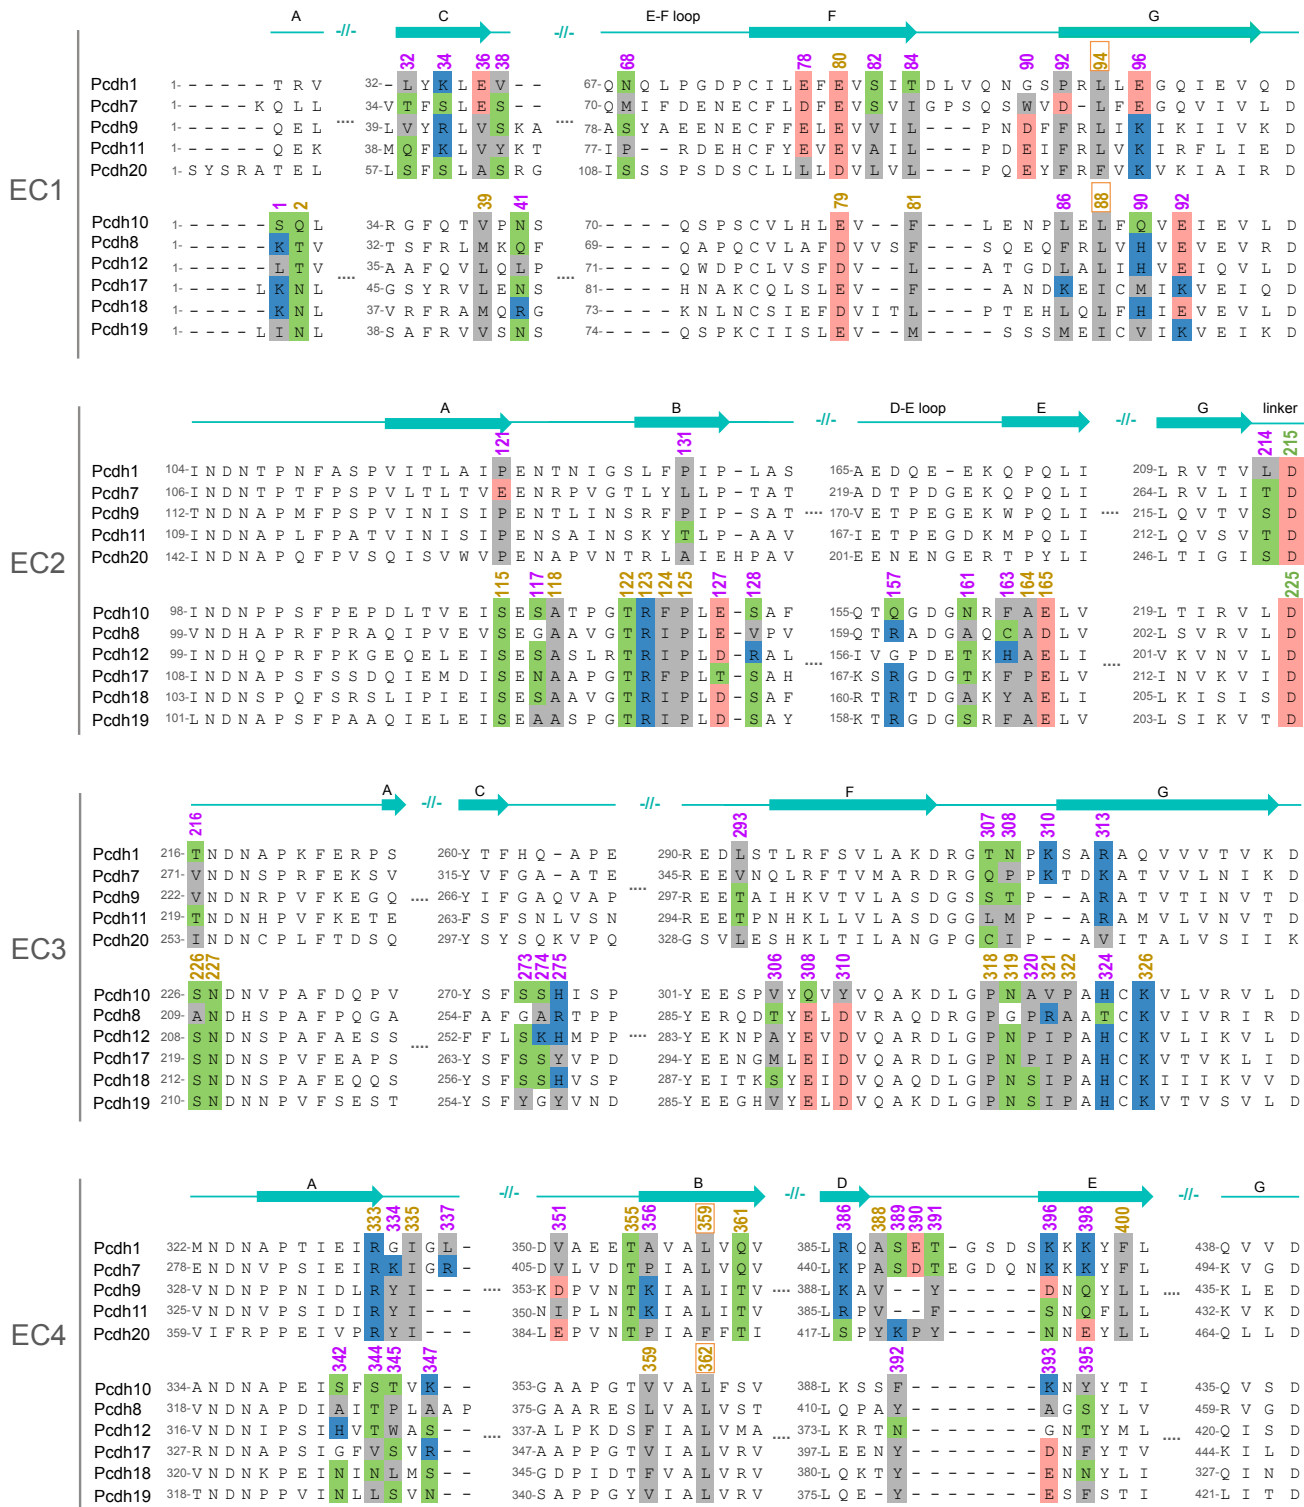

Figure S5: Multiple sequence alignment of human  $\delta$  protocadherin adhesive domains EC1-4, Related to Figure 3.

Aligned amino acid sequences are separated into  $\delta 1$  and  $\delta 2$  subfamilies (top and bottom); secondary structure derives from the pcdh1 structure. Interfacial residue positions from *trans* dimer structures of pcdh1 ( $\delta 1$ ) or pcdh10 ( $\delta 2$ ) are shaded in all sequences according to amino acid type (gray:nonpolar/aromatic, green:polar, blue:basic, red:acidic, unshaded:glycine) and numbered in gold (conserved in character within subfamily) or purple (non-conserved). Interface numbering refers to pcdh1(top) and pcdh10 (bottom). Interface residues that coordinate Calcium are numbered in green. Pcdh8, which may dimerize weakly, was excluded from  $\delta 2$  conservation determination. Omitted non-interface regions are indicated by "...".

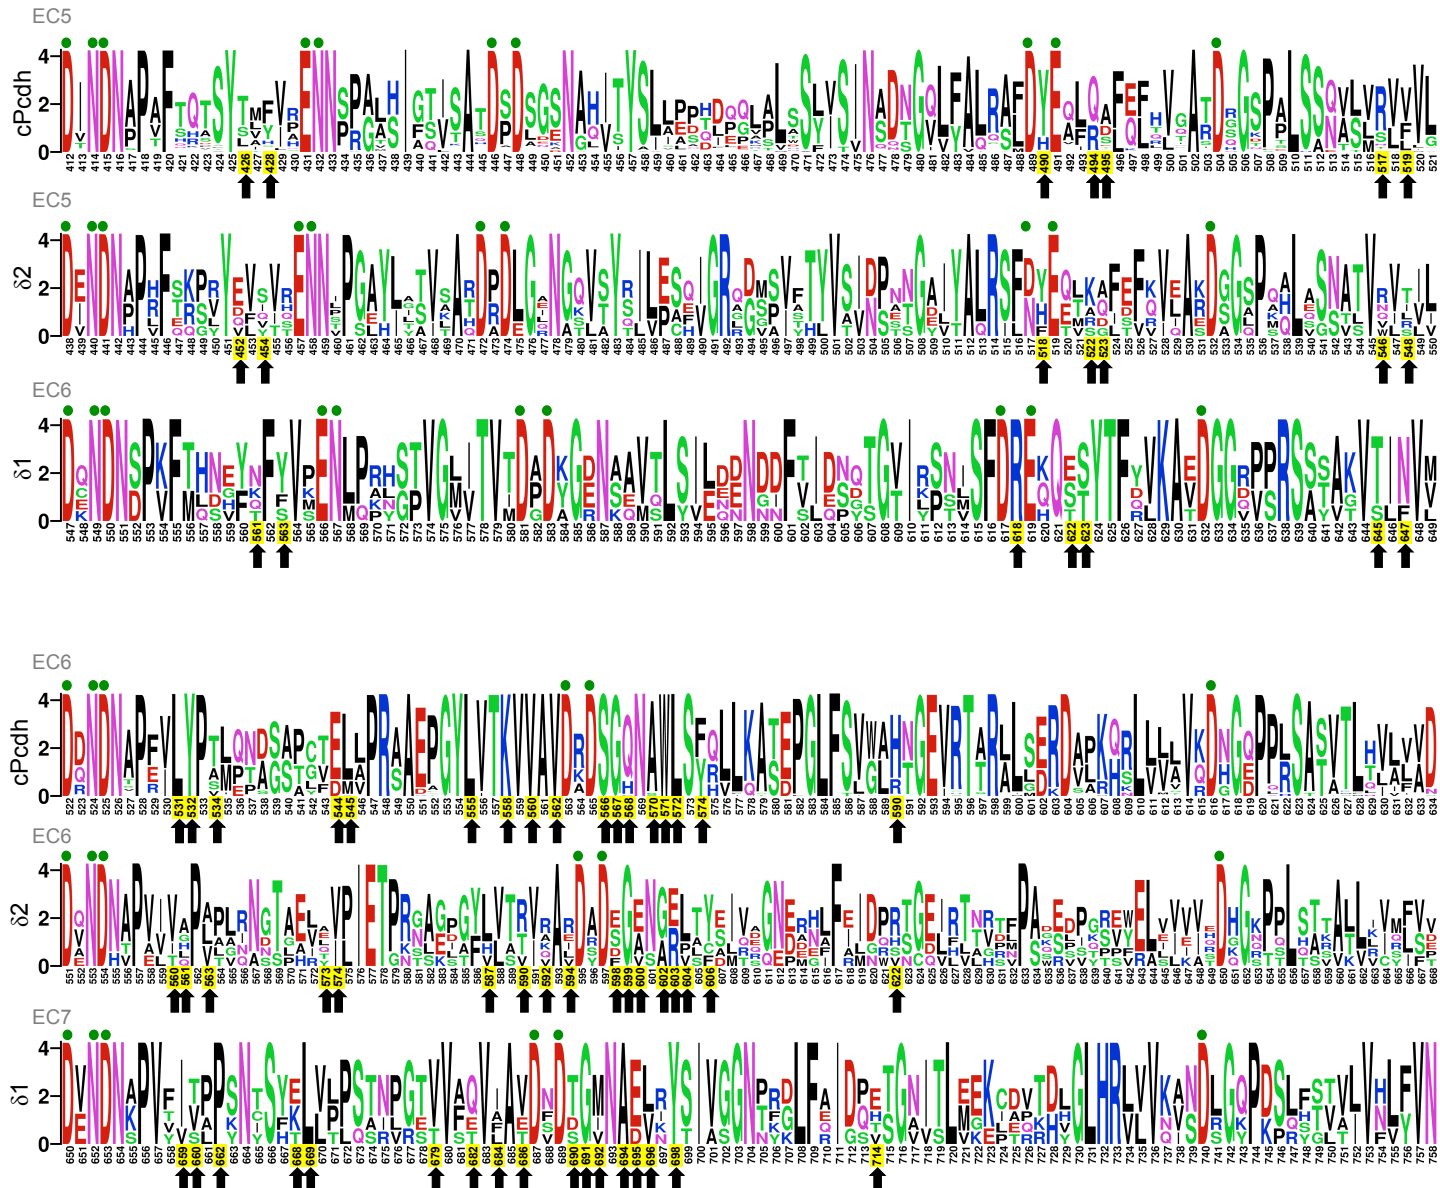

**Figure S6: Sequence Logo plot of aligned putative *cis* dimerization regions, Related to Figure 5.**

Amino acid sequences of EC5-6 regions of mouse  $\beta$ ,  $\gamma$ A, and  $\gamma$ B clustered protocadherins; EC5-6 regions of human  $\delta$ 2 protocadherins; and EC6-7 regions of human  $\delta$ 1 protocadherins were each aligned to produce Logo plots showing conservation at each residue position. Residue numbering on x axis is based on mouse *pcdh*  $\gamma$ B7 (top plots), human *pcdh*10 (middle plots), and human *pcdh*1 (bottom plots); y axis shows estimated information content in bits. Alignments for each domain are displayed separately. Residues whose side chains are buried (>20% ASA) in the *cis* dimer interface of  $\gamma$ B7 (PDB:5v5x) and the equivalent positions in  $\delta$  protocadherins are highlighted with arrows and yellow shading. Calcium co-ordinating residues, which are highly conserved, are marked with green circles above the plots.

Table S1

Table S1: Crystallographic data collection and refinement statistics, Related to Figures 2 and 5

|                                                     | Pcdh1 EC1-4<br>human            | Pcdh10 EC1-4<br>Monomer form<br>human | Pcdh10 EC1-4<br>Dimer form<br>human | Pcdh17 EC1-4<br>human | Pcdh18 EC1-4<br>human | Pcdh19 EC1-4<br>human          | Pcdh8 EC5-6<br>human | Pcdh8.1 EC1-6<br><i>Xenopus</i> | Pcdh10 EC1-6<br>human          |
|-----------------------------------------------------|---------------------------------|---------------------------------------|-------------------------------------|-----------------------|-----------------------|--------------------------------|----------------------|---------------------------------|--------------------------------|
| <b>DATA COLLECTION</b>                              |                                 |                                       |                                     |                       |                       |                                |                      |                                 |                                |
| Space group                                         | P6 <sub>2</sub> 2 <sub>2</sub>  | C2                                    | C2                                  | C2                    | C2                    | P3 <sub>2</sub> 2 <sub>1</sub> | P2 <sub>1</sub>      | P2 <sub>1</sub>                 | P4 <sub>2</sub> 2 <sub>2</sub> |
| Cell dimensions: <i>a, b, c</i> (Å)                 | 148.6, 148.6, 149.9             | 26.4, 78.9, 238.9                     | 346.6, 73.2, 246.33                 | 214.6, 105.8, 101.4   | 127.0, 177.0, 71.9    | 109.0, 109.0, 309.7            | 41.7, 29.5, 92.4     | 146.7, 42.4, 167.5              | 84.1, 84.1, 543.9              |
| $\alpha, \beta, \gamma$ (°)                         | 90, 90, 120                     | 90, 90, 90                            | 90, 132.1, 90                       | 90, 101.0, 90         | 90, 101.4, 90         | 90, 90, 120                    | 90, 98.5, 90         | 90, 110.6, 90                   | 90, 90, 90                     |
| <b>Resolution (Å)</b>                               | 40-3.2 (3.42-3.20) <sup>1</sup> | 40-2.3 (2.38-2.30)                    | 40-3.6 (3.71-3.60)                  | 40-3.7 (4.0-3.7)      | 40-2.8 (2.92-2.80)    | 40-3.5 (3.71-3.5)              | 40-2.9 (3.07-2.9)    | 40-2.0 (2.03-2.00)              | 40-3.3 (3.48-3.30)             |
| <i>R</i> <sub>merge</sub>                           | 0.12 (1.685)                    | 0.10 (0.89)                           | 0.123 (4.649)                       | 0.211 (0.735)         | 0.083 (1.24)          | 0.14 (2.5)                     | 0.13 (0.57)          | 0.13 (0.56)                     | 0.139 (2.475)                  |
| <i>R</i> <sub>int</sub>                             | 0.12 (1.73)                     | 0.11 (1.00)                           | 0.146 (5.476)                       | 0.248 (0.866)         | 0.094 (1.41)          | 0.15 (2.6)                     | 0.16 (0.72)          | 0.153 (0.62)                    | 0.145 (2.570)                  |
| <i>R</i> <sub>anom</sub>                            | 0.028 (0.394)                   | 0.044 (0.44)                          | 0.077 (2.871)                       | 0.128 (0.451)         | 0.042 (0.64)          | 0.047 (0.814)                  | 0.08 (0.44)          | 0.071 (0.27)                    | 0.040 (0.687)                  |
| <i>CC1/2</i>                                        | 1.0 (0.81)                      | 1.0 (0.83)                            | 1.0 (0.29)                          | 1.0 (0.71)            | 1.0 (0.83)            | 1.0 (0.72)                     | 0.99 (0.71)          | 1.00 (0.88)                     | 1.0 (0.95)                     |
| <i>I/σI</i>                                         | 15.9 (2.1)                      | 11.0 (1.6)                            | 5.4 (0.4)                           | 5.4 (1.6)             | 10.2 (1.4)            | 9.4 (1.1)                      | 8.2 (1.7)            | 5.8 (3.0)                       | 10.7 (1.6)                     |
| Unique reflections                                  | 16 684 (2 938)                  | 23 366 (2 283)                        | 52 814 (4 543)                      | 22 957 (4 468)        | 38 201 (4 506)        | 27 770 (4 378)                 | 5 168 (803)          | 2 974 (2 974)                   | 30 910 (4 386)                 |
| Multiplicity                                        | 18.3 (19.1)                     | 6.1 (4.7)                             | 3.4 (3.6)                           | 3.5 (3.4)             | 4.8 (4.6)             | 9.8 (10.4)                     | 3.3 (2.3)            | 4.4 (4.9)                       | 12.9 (13.7)                    |
| Completeness (%)                                    | 100.0 (100.0)                   | 99.7 (98.8)                           | 98.2 (98.3)                         | 96.7 (92.1)           | 97.2 (91.4)           | 99.9 (99.9)                    | 99.6 (99.1)          | 97.5 (12.3)                     | 99.7 (99.5)                    |
| Ellipsoid completeness (%)                          | n/a                             | n/a                                   | n/a                                 | n/a                   | n/a                   | n/a                            | n/a                  | 89.4 (88.8)                     | n/a                            |
| <b>REFINEMENT</b>                                   |                                 |                                       |                                     |                       |                       |                                |                      |                                 |                                |
| Resolution (Å)                                      | 20-3.2                          | 20-3.6                                | 20-3.6                              | 20-3.7                | 20-2.8                | 20-3.5                         | 20-2.9               | 20-3.0/3.0/2.0 <sup>3</sup>     | 20-4.2/4.2/3.3                 |
| Unique reflections                                  | 16 561                          | 50 085                                | 23 284                              | 23 284                | 37 912                | 2 7510                         | 5 138                | 59 447                          | 19 771                         |
| Molecules per a.s.u.                                | 1                               | 5                                     | 4                                   | 2                     | 2                     | 3                              | 1                    | 2                               | 1                              |
| <i>R</i> <sub>work</sub> / <i>R</i> <sub>free</sub> | 0.2255/0.2659                   | 0.1943/0.2333                         | 0.2737/0.2899                       | 0.2508/0.2948         | 0.2480/0.2692         | 0.2581/0.2874                  | 0.2250/0.2571        | 0.253/0.297                     | 0.2410/0.2899                  |
| <i>N</i> <sub>o</sub> atoms                         | 3 365                           | 3 282                                 | 16 399                              | 12 832                | 6 742                 | 9 763                          | 1 670                | 9 847                           | 5 006                          |
| Protein                                             | 63                              | 57                                    | 510                                 | 499                   | 262                   | 172                            | 75                   | 184                             | 137                            |
| Ligand/ion                                          | 15                              | 105                                   | 23                                  | 6                     | 50                    | 11                             | 5                    | 138                             | 17                             |
| <i>B</i> -factors                                   |                                 |                                       |                                     |                       |                       |                                |                      |                                 |                                |
| Protein                                             | 134.22                          | 57.7                                  | 233.3                               | 119.6                 | 110.5                 | 174.0                          | 47.8                 | 69.0                            | 94.3                           |
| Ligand/ion                                          | 181.13                          | 64.6                                  | 245.0                               | 152.9                 | 142.0                 | 229.8                          | 62.3                 | 73.2                            | 117.5                          |
| Water                                               | 104.53                          | 50.51                                 | 225.1                               | 89.3                  | 98.9                  | 130.0                          | 42.0                 | 37.8                            | 36.9                           |
| <i>R</i> <sub>ms</sub> deviations                   |                                 |                                       |                                     |                       |                       |                                |                      |                                 |                                |
| Bond lengths (Å)                                    | 0.0086                          | 0.0130                                | 0.0131                              | 0.0079                | 0.0160                | 0.0046                         | 0.0064               | 0.0057                          | 0.0102                         |
| Bond angles (°)                                     | 0.552                           | 0.866                                 | 0.789                               | 0.818                 | 0.767                 | 0.798                          | 0.811                | 0.814                           | 0.617                          |
| <i>Ramachandran</i>                                 |                                 |                                       |                                     |                       |                       |                                |                      |                                 |                                |
| Favored (%)                                         | 96.8                            | 96.2                                  | 96.7                                | 93.5                  | 94.6                  | 94.8                           | 97.3                 | 95.9                            | 95.3                           |
| Allowed (%)                                         | 3.2                             | 3.8                                   | 3.3                                 | 6.5                   | 5.4                   | 5.2                            | 2.7                  | 4.1                             | 4.7                            |
| Outliers (%)                                        | 0                               | 0                                     | 0                                   | 0                     | 0                     | 0                              | 0                    | 0                               | 0                              |
| <b>PDB Accession</b>                                | 6VFP                            | 6VFQ                                  | 6VEW                                | 6VFT                  | 6VFR                  | 6VFU                           | 6VFE                 | 6VGI                            | 6VG4                           |

1. Values in parentheses refer to the highest resolution shell
2. Data for pcdh8.1 and pcdh10 EC1-6 were processed using truncation (Staraniso server) to exclude weak reflections due to diffraction anisotropy; additional values for spherical processing are shown
3. Ellipsoidally truncated data were used in refinement



**Table S2: Dimer buried surface areas (BSA), Related to Figure 2**

|                | <b>BSA dimer<br/>(Å<sup>2</sup>)</b>                | <b>Hydrophobic<br/>BSA</b>             | <b>BSA<sub>EC1:4</sub></b>             | <b>BSA<sub>EC2:3</sub></b>             | <b>BSA<sub>EC1 FG<br/>loop:EC2</sub></b> |
|----------------|-----------------------------------------------------|----------------------------------------|----------------------------------------|----------------------------------------|------------------------------------------|
| <b>Pcdh-1</b>  | 2986                                                | 1859 (62%) <sup>2</sup>                | 2238 (75%)                             | 652 (22%)                              | 96 (3%)                                  |
| <b>Pcdh-10</b> | 3458 (A:C) <sup>1</sup><br>3297 (B:D)<br>3529 (E:E) | 2334 (68%)<br>2236 (68%)<br>2307 (65%) | 1325 (38%)<br>1137 (34%)<br>1479 (42%) | 2133 (62%)<br>2161 (66%)<br>2050 (58%) | 0 (0%)<br>0 (0%)<br>0 (0%)               |
| <b>Pcdh-17</b> | 2024 (A:D)<br>2071 (B:C)                            | 1227 (61%)<br>1288 (62%)               | 932 (46%)<br>937 (45%)                 | 1011 (50%)<br>979 (47%)                | 81 (4%)<br>155 (8%)                      |
| <b>Pcdh-18</b> | 3719                                                | 2518 (69%)                             | 2136 (57%)                             | 1534 (42%)                             | 49 (1%)                                  |
| <b>Pcdh-19</b> | 4176 (A:C)<br>4169 (B:B)                            | 3071 (74%)<br>2933 (70%)               | 1994 (48%)<br>1918 (46%)               | 2120 (51%)<br>2252 (54%)               | 62 (1%)<br>0 (0%)                        |

1. Values for dimers in crystallographic asymmetric unit are listed separately, indicated by chain IDs
2. Percentage of total dimer BSA

**Table S3: Tomography data collection and deposition information, Related to Figure 6.**

| Tomogram         | Tilt range  | Nominal Defocus [ $\mu\text{m}$ ] | Pixel size [ $\text{\AA}$ ] | EMDB  | Description of biological content                                                                                                                                                                                  |
|------------------|-------------|-----------------------------------|-----------------------------|-------|--------------------------------------------------------------------------------------------------------------------------------------------------------------------------------------------------------------------|
| <b>Pcdh1 #1</b>  | -39.9-42.9° | -4.02                             | 2.7975                      | 21188 | $\delta 1$ Pcdh1 EC1-7 ectodomains accumulate at flattened junctional regions between aggregated liposomes. Note apparent midlines and irregular distribution in top views (between vertically stacked liposomes). |
| <b>Pcdh1 #2</b>  | -30.8-52.8° | -4.00                             | 1.83586                     | 21189 |                                                                                                                                                                                                                    |
| <b>Pcdh1 #3</b>  | -46.2-44.0° | -4.00                             | 1.83586                     | 21190 |                                                                                                                                                                                                                    |
| <b>Pcdh10 #1</b> | -46.0-54.0° | -3.54                             | 1.83586                     | 21191 | $\delta 2$ Pcdh10 EC1-6 ectodomains accumulate at flattened junctional regions between aggregated liposomes. Note irregular distribution in top views and apparent disorder in junction side views                 |
| <b>Pcdh10 #2</b> | -46.0-58.0° | -3.45                             | 1.83586                     | 21192 |                                                                                                                                                                                                                    |
| <b>Pcdh10 #3</b> | -52.0-50.0° | -3.44                             | 1.83586                     | 21193 |                                                                                                                                                                                                                    |
